# Supplementary material
Source: publisher figshare collection journal article supplement (https://acs.figshare.com/ndownloader/files/4096006)
Supplement: Supplementary file 1 [file 4096006]

## Supplementary Material

# The Chemical Potential of Molecules Contrasted to Averaged Atomic Electronegativities: Alarming Differences and their Theoretical Rationalization.

Dipankar Datta<sup>1,\*</sup>, Nirmal K. Shee<sup>1</sup> and László von Szentpály<sup>2,\*</sup>

<sup>1</sup> Department of Inorganic Chemistry, Indian Association for the Cultivation of Science, Calcutta 700 032, India

<sup>2</sup> Institut für Theoretische Chemie, Universität Stuttgart, Pfaffenwaldring 55, D-70565 Stuttgart, Germany

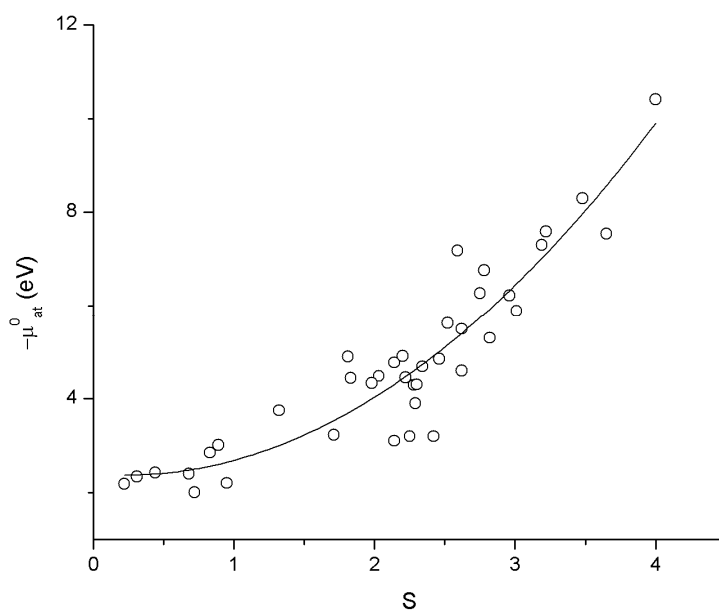

**Figure S.** Relation between  $\mu_{at}^0$  and Sanderson's electronegativity  $S$  for elemental atoms.
